# Supplementary material for: Lipopolysaccharides Enhance Epithelial Hyperplasia and Tubular Adenoma in Intestine-Specific Expression of krasV12 in Transgenic Zebrafish
Source: MDPI journal article supplement (doi:10.3390/biomedicines9080974), 2021-08-07
Supplement: s1 [file s1]

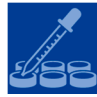

Supplementary materials

# Lipopolysaccharides Enhance Epithelial Hyperplasia and Tubular Adenoma in Intestine-Specific Expression of *kras*<sup>V12</sup> in Transgenic Zebrafish

Jeng-Wei Lu <sup>1,2,\*</sup>, Yuxi Sun <sup>1,3</sup>, Pei-Shi Angelina Fong <sup>1</sup>, Liang-In Lin <sup>2,4</sup>, Dong Liu <sup>3</sup> and Zhiyuan Gong <sup>1,\*</sup>

**Table S1.** Information of antibodies used in this study

| Name                                | Catalog number | Dilution | Company                                     |
|-------------------------------------|----------------|----------|---------------------------------------------|
| Rabbit anti-pcna                    | GTX124496      | 200      | GeneTex, CA, USA                            |
| Rabbit anti-Cleaved Caspase-3(D175) | 9661S          | 200      | Cell Signaling Technology, Danvers, MA, USA |
| Rabbit p-AKT (S473)                 | 4060S          | 200      | Cell Signaling Technology, Danvers, MA, USA |
| Anti-MAP Kinase                     | M9692          | 100      | Sigma, St. Louis, MO, USA                   |
| Rabbit anti-Histone H3              | ab5176         | 200      | Abcam, Cambridge, UK                        |
| Alexa Fluor 546 Donkey anti-rabbit  | A10040         | 200      | Invitrogen, Carlsbad, CA, USA               |
| Alexa Fluor 488 Donkey anti-mouse   | A21202         | 200      | Invitrogen, Carlsbad, CA, USA               |

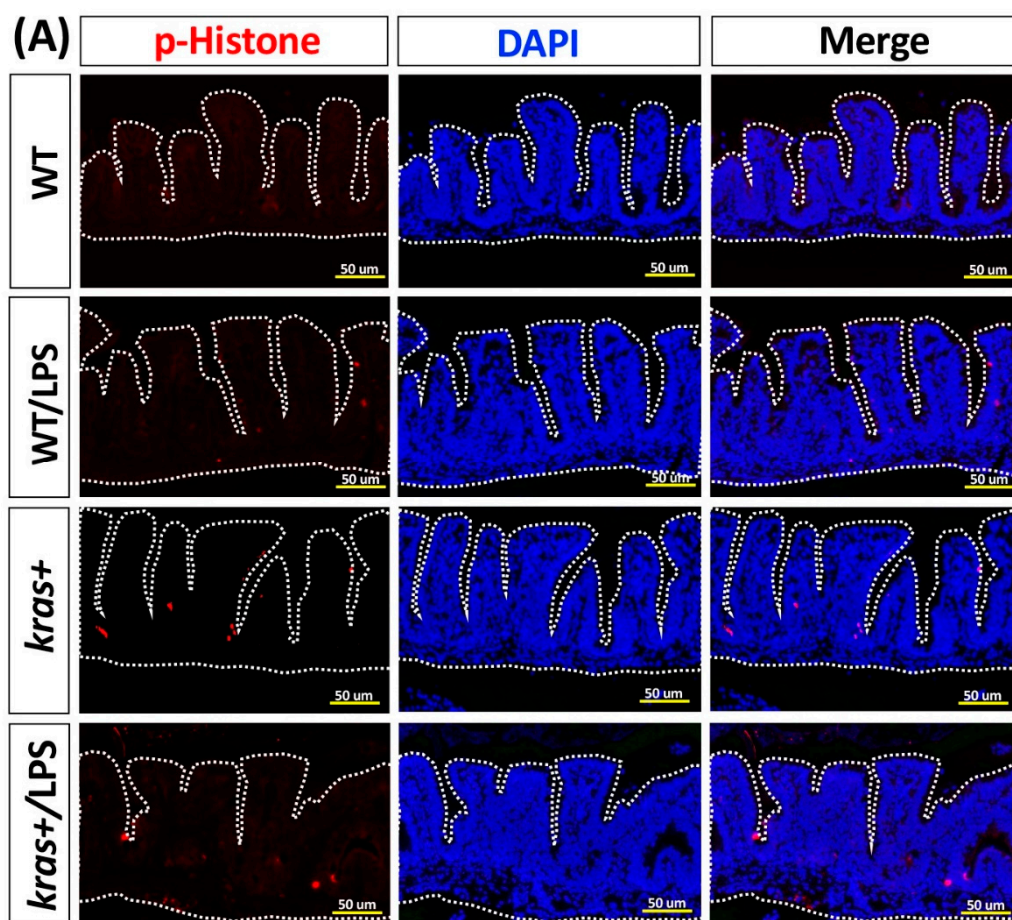

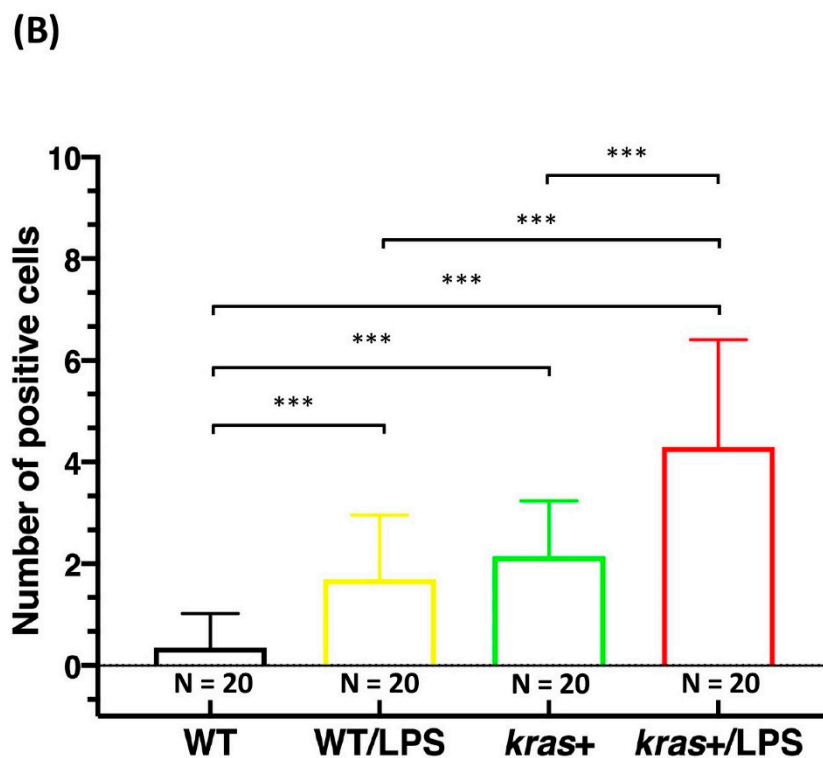

**Figure S1.** Expression of *kras*<sup>V12</sup> with LPS treatment enhanced the increase in p-Histone in intestinal epithelial cells. **(A)** Immunofluorescence staining (red) was carried out in intestinal paraffin sections of WT (n= 20), WT/LPS (n= 20), *kras*<sup>+</sup> (n= 20), and *kras*<sup>+</sup>/LPS (n= 20) zebrafish. **(B)** Immunofluorescence staining of p-Histone as a marker of mitosis, and quantification of the number of positive cells. Differences among the variables were assessed using Student's t-tests. Statistical significance: \*P<0.05, \*\*P<0.01, \*\*\*P<0.001. Scale bar: 50  $\mu$ m.

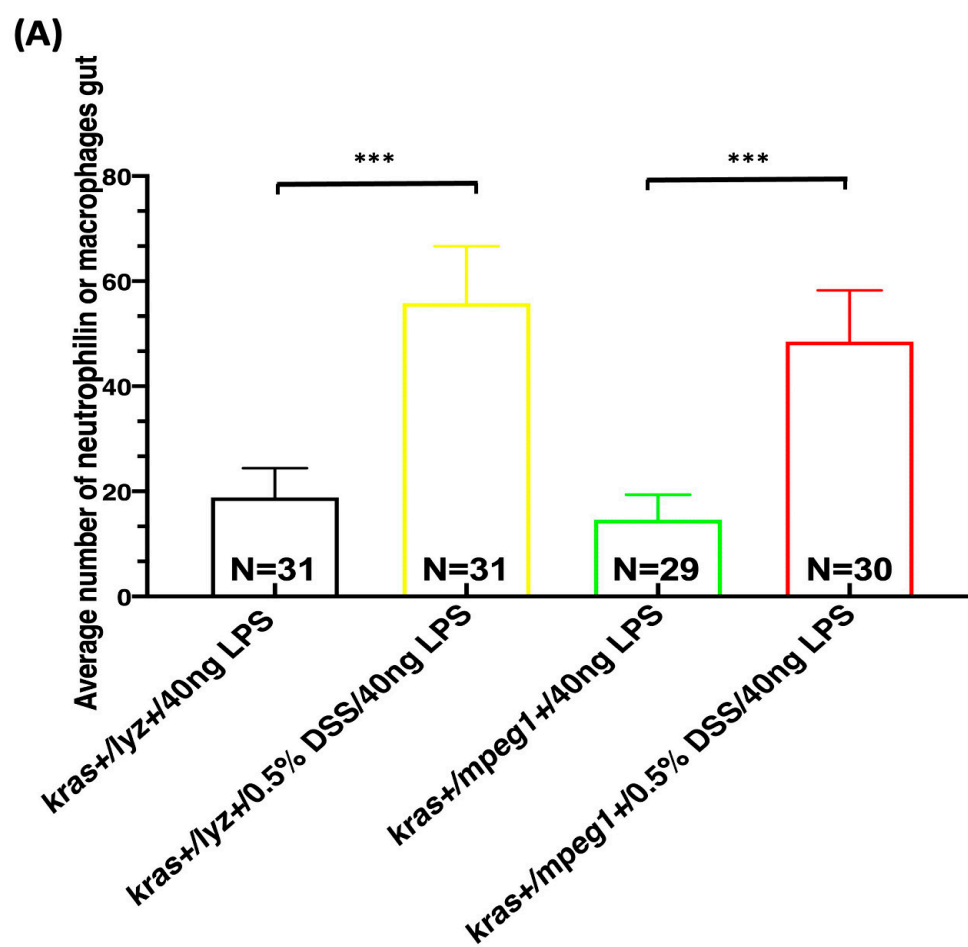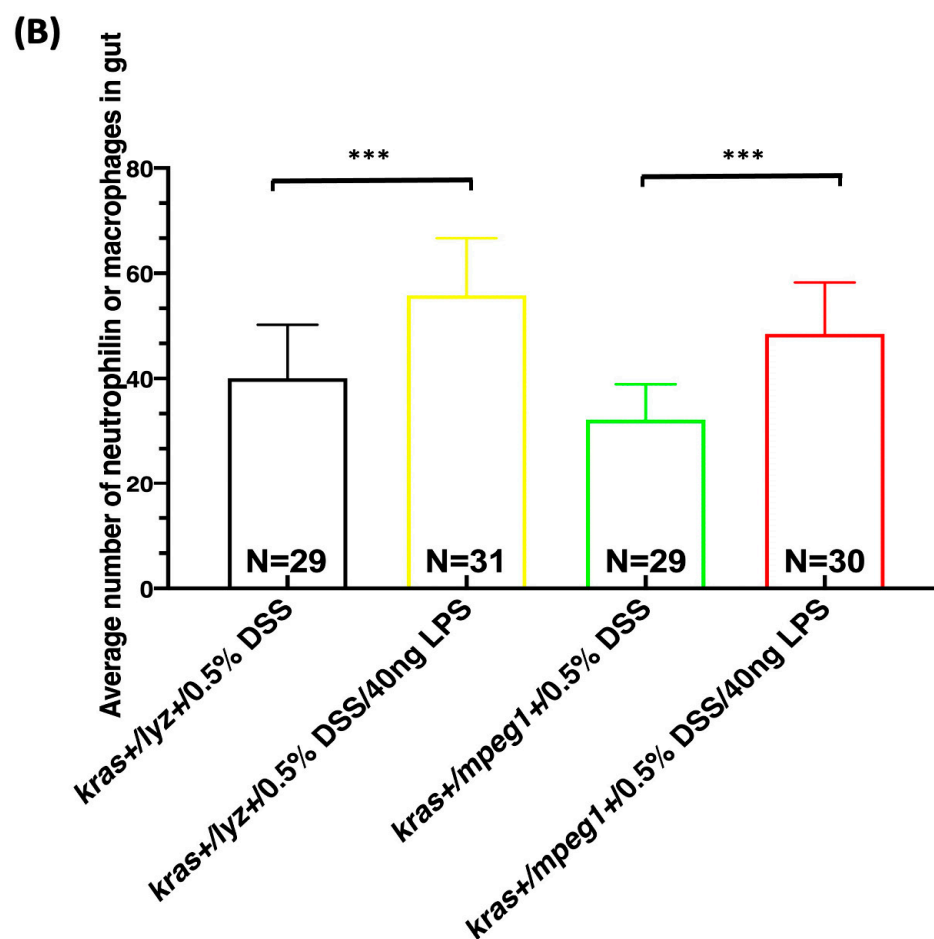

**Figure S2.** LPS/DSS co-treatment significantly enhanced the increase number in neutrophils and macrophages in the intestine during the larval stage in *kras+/lyz+/LPS* and *kras+/lyz+/DSS* as well as in *kras+/mpeg1+/LPS* and *kras+/mpeg1+/DSS* zebrafish. **(A and B)** Quantification of the number of positive cells as revealed by fluorescence of neutrophils or macrophages in the intestine (*kras+/lyz+/LPS*, n= 31; *kras+/lyz+/DSS*, n= 29; *kras+/lyz+/LPS/DSS*, n= 31; *kras+/mpeg1+/LPS*, n= 29; *kras+/mpeg1+/DSS*, n= 29; *kras+/mpeg1+/LPS/DSS*, n= 30). Differences among the variables were assessed using Student's t-tests. Statistical significance: \*P<0.05, \*\*P<0.01, \*\*\*P<0.001.

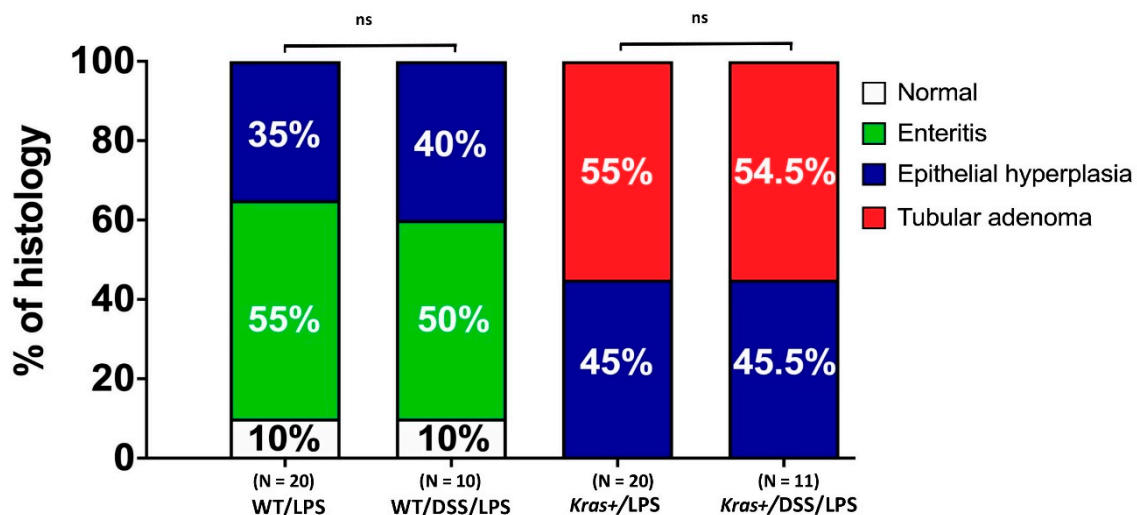

**Figure S3.** No significant synergistic effects on intestinal tumorigenesis between WT/LPS and WT/LPS/DSS or between *kras*<sup>+</sup>/LPS and *kras*<sup>+</sup> with DSS/LPS adult stage zebrafish. Summary of intestinal histological abnormalities observed in the four experimental groups. The data were generated from results of a blinded histological analysis (WT/LPS, n= 20; WT/DSS/LPS, n= 10; *kras*<sup>+</sup>/LPS, n= 11; *kras*<sup>+</sup> with DSS/LPS, n= 11). Differences among the variables were assessed using one-way ANOVA. Statistical significance: \*P<0.05, \*\*P<0.01, \*\*\*P<0.001.
